# Supplementary material for: One pot three-component reaction for covalent immobilization of enzymes: application of immobilized lipases for kinetic resolution of rac-ibuprofen
Source: Royal Society of Chemistry journal article supplement (doi:10.1039/c6ra11284f), 2016-01-01
Supplement: c6ra11284f1.pdf [file c6ra11284f1.pdf]

**Supporting Information for:**

**One pot three-component reaction for covalent immobilization of enzymes: Application of immobilized lipases for kinetic resolution of *rac*-ibuprofen**

Mehdi Mohammadi<sup>\*a</sup>, Somayyeh Gandomkar<sup>b</sup>, Zohreh Habibi<sup>\*\*b</sup>, Maryam Yousefi<sup>c</sup>

*<sup>a</sup>Bioprocess Engineering Department, Institute of Industrial and Environmental Biotechnology, National Institute of Genetic Engineering and Biotechnology (NIGEB), P.O.Box:14965/161 Tehran, Iran.*

*<sup>b</sup>Department of Pure Chemistry, Faculty of Chemistry, Shahid Beheshti University, G.C., Tehran, Iran*

*<sup>c</sup>Nanobiotechnology Research Center, Avicenna Research Institute, ACECR, Tehran, Iran*

## Characterization of the supports

Figure S1. FT-IR spectrum of SBA-15 (a), FT-IR spectrum of SBA-epoxy (b)

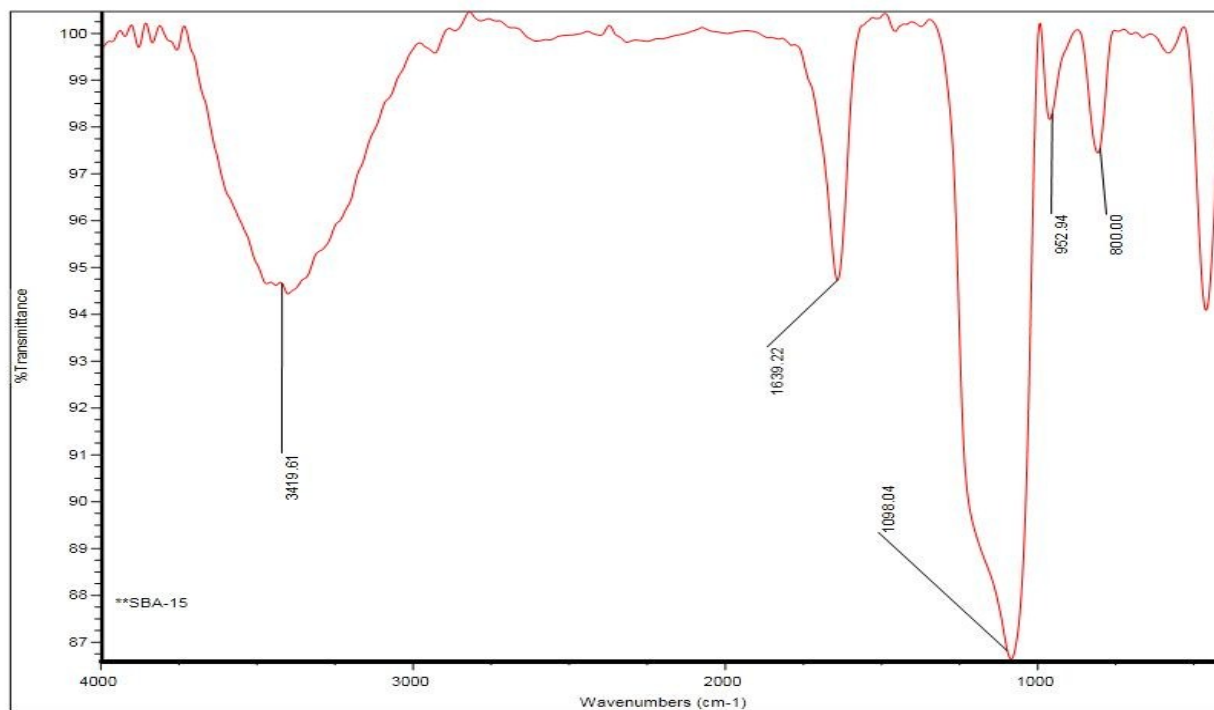

a الف

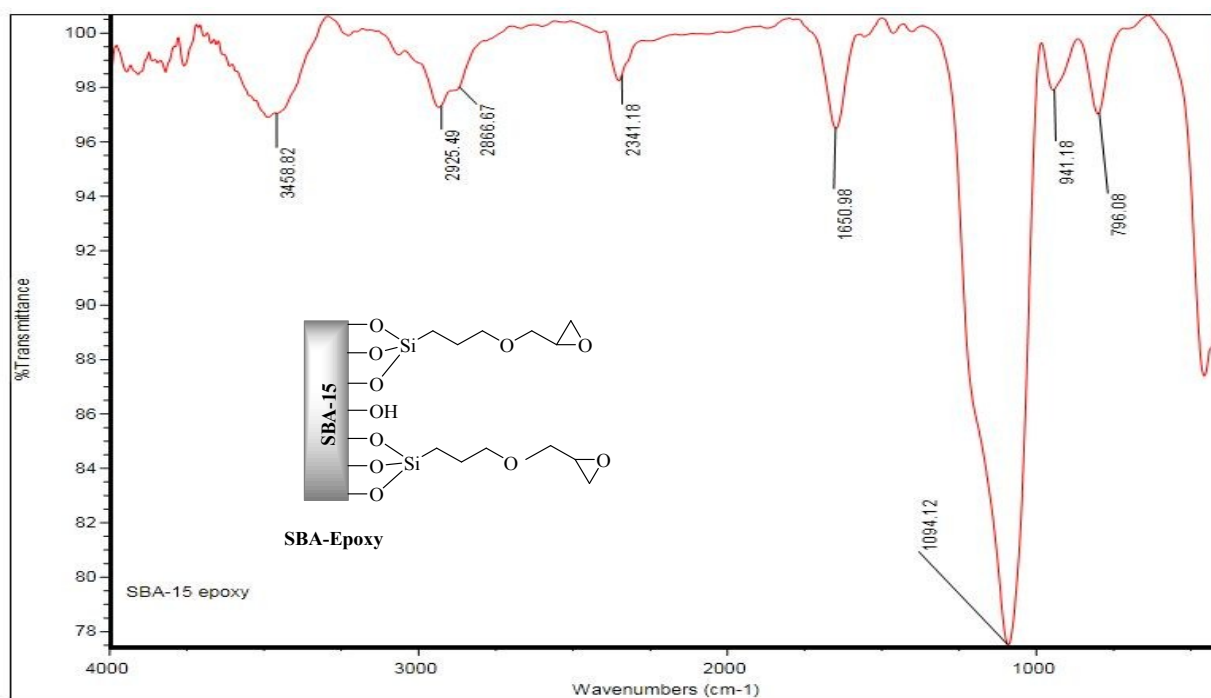

b

Figure S2. TG analysis of a) SBA-epoxy b) Silica-epoxy

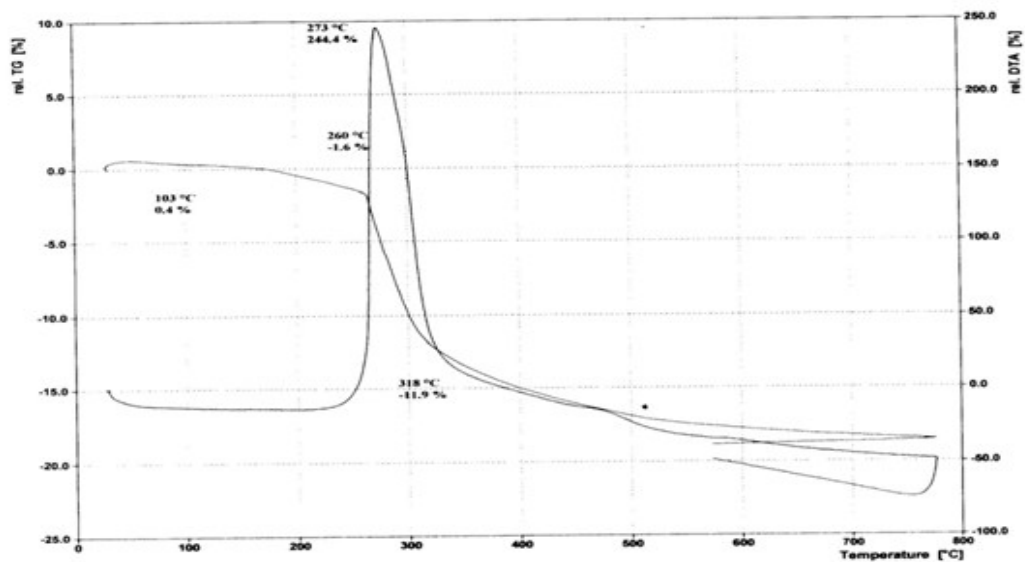

a

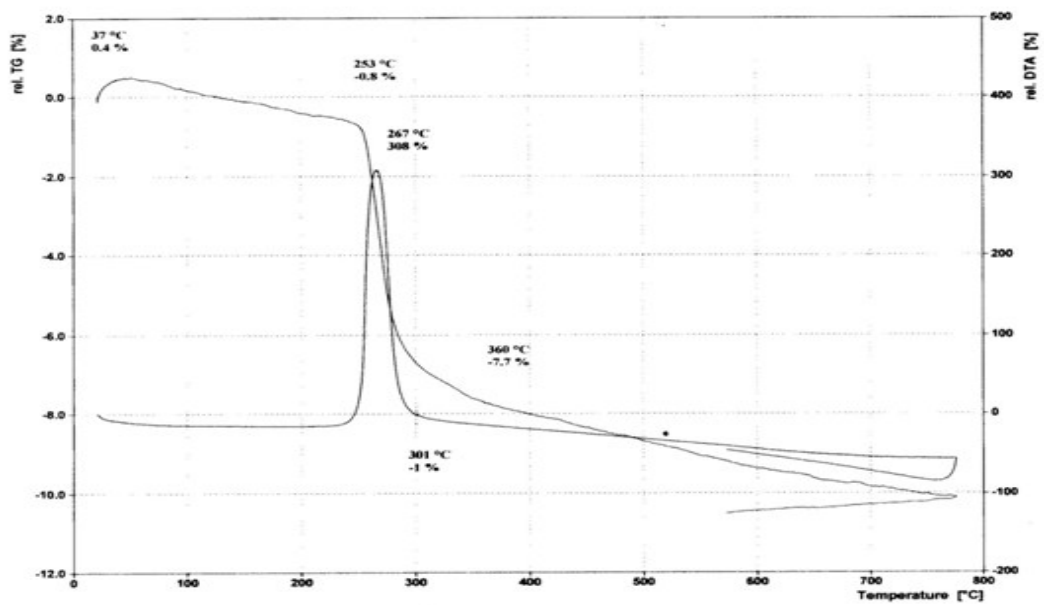

b

Figure S3. XRD patterns of SBA-15 before (a) and after functionalization (b).

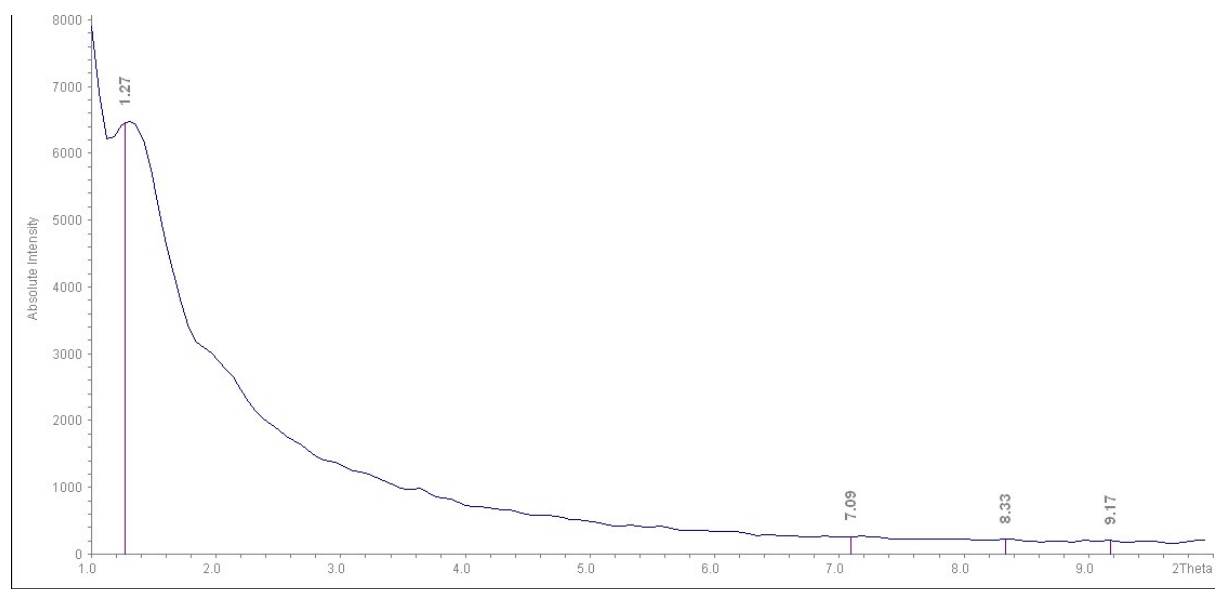

a

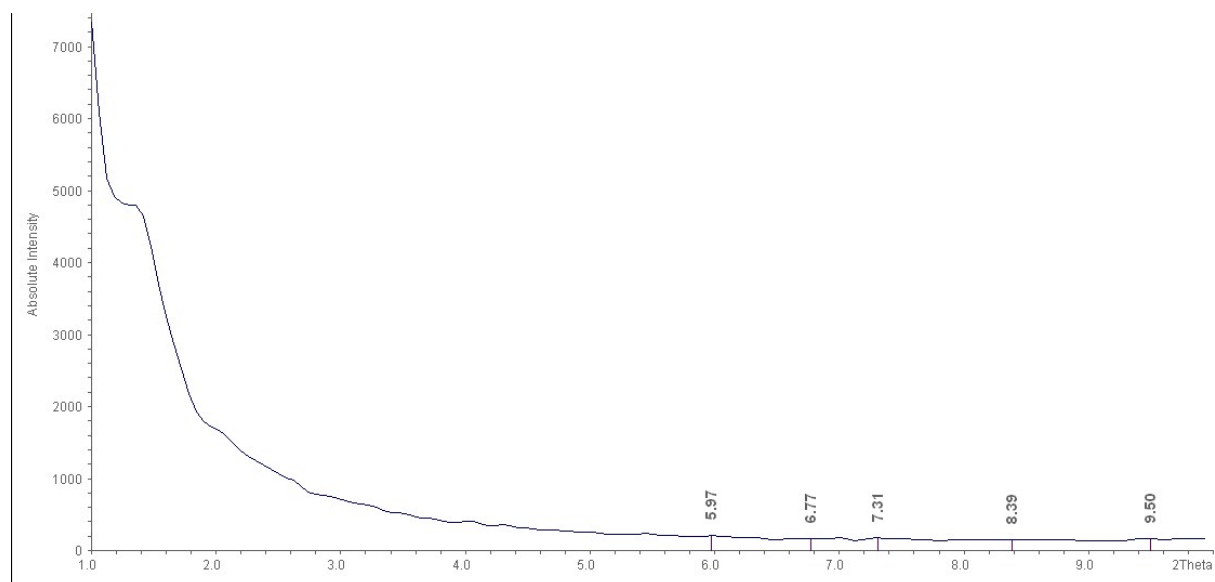

b
